# Supplementary material for: Improving the therapeutic efficacy of mesenchymal stromal cells to restore perfusion in critical limb ischemia through pulsed focused ultrasound
Source: PubMed Central journal article supplement (PMC5294408; doi:10.1038/srep41550), 2017-02-07

**Supplemental Data and information for:**

**Improving the therapeutic efficacy of mesenchymal stromal cells to restore perfusion in critical limb ischemia through pulsed focused ultrasound**

Pamela A. Tebebi<sup>1,2</sup>, Saejeong J. Kim<sup>1</sup>, Rashida A. Williams<sup>1</sup>, Blerta Milo<sup>1</sup>, Victor Frenkel<sup>3</sup>,  
Scott R. Burks<sup>1</sup>, and Joseph A. Frank<sup>1,4</sup>

<sup>1</sup>Frank Lab, Radiology and Imaging Sciences Dept., Clinical Center, National Institutes of Health, Bethesda, Maryland, USA, <sup>2</sup>Department of Biomedical Engineering, Catholic University of America, Washington, DC, USA, <sup>3</sup>Department of Diagnostic Radiology and Nuclear Medicine, University of Maryland School of Medicine, Baltimore, MD, USA and <sup>4</sup>National Institutes of Biomedical Imaging and Bioengineering, National Institutes of Health, Bethesda, Maryland, USA

**Corresponding Author**

Joseph Frank M.S. M.D.  
Building 10 Room B1N256  
10 Center Drive MSC 1074  
Bethesda, Maryland 20892-1074  
phone 301-402-4314  
fax 301-402-3216  
[jfrank@helix.nih.gov](mailto:jfrank@helix.nih.gov)

Supplemental Table 1: List of Abbreviations

|               |                                                                |
|---------------|----------------------------------------------------------------|
| bFGF          | Basic Fibroblast Growth Factor                                 |
| BMSC          | Bone Marrow Stromal Cells                                      |
| CAM           | Cell Adhesion Molecules                                        |
| CCTF          | Cytokines, Chemokines, Trophic Factors                         |
| FUS           | Focused Ultrasound                                             |
| GCSF          | Granulocyte Colony-Stimulating Factor                          |
| GMCSF         | Granulocyte Macrophage Colony-Stimulating Factor               |
| HSP-70        | Heat Shock Protein 70                                          |
| ICAM          | Intercellular Adhesion Molecule                                |
| IFN $\gamma$  | Interferon Gamma                                               |
| IGF-1         | Insulin-like Growth Factor                                     |
| IL1 $\alpha$  | Interleukin-1 Alpha                                            |
| IL1 $\beta$   | Interleukin-1 Beta                                             |
| IL2           | Interleukin-2                                                  |
| IL3           | Interleukin 3                                                  |
| IL4           | Interleukin 4                                                  |
| IL5           | Interleukin 5                                                  |
| IL6           | Interleukin 6                                                  |
| IL9           | Interleukin 9                                                  |
| IL10          | Interleukin 10                                                 |
| IL12p40       | Interleukin 12 (p40 subunit)                                   |
| IL12p70       | Interleukin 12 (p70 subunit)                                   |
| IL13          | Interleukin 13                                                 |
| IL15          | Interleukin 15                                                 |
| IL17          | Interleukin 17                                                 |
| IL18          | Interleukin 18                                                 |
| KC            | Keratinocyte-derived Chemokine or Keratinocyte Chemoattractant |
| LIF           | Leukemia Inhibitory Factor                                     |
| MSC           | Mesenchymal Stem Cell                                          |
| MCP1          | Monocyte Chemoattractant Protein-1                             |
| MCSF          | Monocyte Colony Stimulating Factor                             |
| MIG           | Monokine Induced by Gamma-Interferon                           |
| MIP1 $\alpha$ | Macrophage Inflammatory Protein 1 Alpha                        |
| MIP1 $\beta$  | Macrophage Inflammatory Protein 1 Beta                         |
| MIP2          | Macrophage Inflammatory Protein 2                              |
| NF $\kappa$ B | Nuclear Factor Kappa-Light-Chain-Enhancer of Activated B Cells |
| PDGF          | Platelet-Derived Growth Factor                                 |
| pFUS          | Pulsed Focused Ultrasound                                      |
| RANTES        | Regulated on Activation, Normal T-Cell Expressed and Secreted  |
| SCF           | Stem Cell Factor                                               |

|                |                                     |
|----------------|-------------------------------------|
| SDF-1 $\alpha$ | Stromal Cell-Derived Factor 1 Alpha |
| TNF $\alpha$   | Tumor Necrosis Factor Alpha         |
| VCAM           | Vascular Cell Adhesion Molecule     |
| VEGF           | Vascular Endothelial Growth Factor  |

Supplemental Table 2: Pre-clinical PAD studie

| Ref #    | Animal Model                                           | Age             | Ischemia Model | Cell type                                                       | Route of admin. | Time of Cell Admin Post-PAD | Outcome-first day increase in perfusion |
|----------|--------------------------------------------------------|-----------------|----------------|-----------------------------------------------------------------|-----------------|-----------------------------|-----------------------------------------|
| 45       | C57BL/6 m;<br>CD4 <sup>-/-</sup> m                     | 12w<br>k        | Acute          | mCD4 <sup>+</sup> cells,<br>mCD4<br>depleted<br>spleenocytes    | IV              | Day 3                       | Day 28                                  |
| 48       | Athymic nude m                                         | 8-<br>10w<br>k  | Critical       | CM-Dil-<br>labeled hEPC                                         | IV              | Day 0                       | Day 21                                  |
| 46       | Nude KSN/Slc m                                         | 8wk             | Acute          | h-VPC                                                           | IA              | Day -1                      | Day 14                                  |
| N/A<br>* | Immunodeficient m                                      | NR              | Critical       | hBM-EC,<br>hiPSC-EC,<br>hESC-CE                                 | IM              | Day 0                       | Day 14                                  |
| 18       | Syngenic FVB m                                         | 10-<br>12w<br>k | Acute          | mMNC                                                            | IM<br>IM        | Day 0                       | NS                                      |
|          | C57BL/6 m                                              | 10-<br>12w<br>k | Acute          | mMNC                                                            | IV              | Day 0                       | NS                                      |
| 15       | Athymic nude r                                         | 5<br>wk         | Acute          | hEPC + SW                                                       | IV              | 3wk                         | 2 wk post<br>treatment                  |
| 19       | C57BL/6 m                                              | 6-8<br>wk       | Acute          | mMNC                                                            | IM              | Day 0                       | Day 7                                   |
| 16       | Athymic nu r                                           | 8wk             | Acute          | hEPC                                                            | IM              | Day28<br>Day 31<br>Day 34   | Day 42                                  |
| 20       | C57BL/6J m                                             | 8wk             | Acute          | mMSC +<br>Simvastatin<br>(for 21 days)<br>rEPC;                 | IM              | Day 0                       | Day 21                                  |
| 17       | Fisher F344 r                                          | NR              | Acute          | UM-SDF-1 +<br>rEPC                                              | IV              | Day 14                      | Day 28                                  |
| 13       | NOD/SCID $\beta$ 2M null<br>or<br>NOD/SCID/MPSVII<br>m | NR              | Acute          | hMNC,<br>ALDHlo,<br>ALDHhi<br>cells, CD14 <sup>+</sup><br>cells | IV              | Day 0-<br>1                 | Day 7                                   |

| Reference | Animal Model        | Age     | Ischemia Model | Cell type                                                      | Route | Time of Cell Admin Post-PAD | Outcome-initial day of significant increase in perfusion |
|-----------|---------------------|---------|----------------|----------------------------------------------------------------|-------|-----------------------------|----------------------------------------------------------|
| 47        | C nude m            | 8-10wk  | Critical       | mADSC                                                          | IM    | Day 1                       | Day 14                                                   |
| 21        | C57BL/6J m          | NR      | Acute          | mMSC                                                           | IM    | Day 0                       | Day 7                                                    |
| 22        | C57BL/6J m          | 12-16wk | Acute          | mMAPC-U, mBMC, mMAPC-VP                                        | IM    | Day 0                       | Day 4                                                    |
|           | BALB/C-nu/nu        | 12-16wk | Critical       | mMAPC-U, mBMC-U2, hMAPC-VP mBMC, mCD34 <sup>+</sup> /M         | IM    | Day 5                       | Day 9                                                    |
| 14        | ApoE <sup>-/-</sup> | 8-15m   | Acute          | cad <sup>+</sup> BMC mCD34 <sup>-</sup> /Mcad <sup>+</sup> BMC | IA    | Day 0                       | Day 0                                                    |

\* Lai, W.H. *et al.* PLoS One 2013;8:e57876

m - mouse; h - human; r - rat; rb - rabbit; nu - nude; IM - intramuscular; IV- intravenous; IA - intra-arterial; EP - electroporation; CM - conditioning media; NR-not reported; NS-not significant; SW-shock wave; wk- week(s); admin-administration, MSCs – mesenchymal stem cell, EPC – endothelial progenitor cell, EC – endothelial progenitor cell, EC – endothelial-like cell, EC – endothelial-like cell, iPSC – induced pluripotent stem cell, BM - bone marrow mononuclear cells, ESC– embryonic stem cells, MNC – bone marrow– derived mononuclear cells, MSC – mesenchymal stem cells, UM – ultrasound-mediated, SDF-1 – stromal cell derived factor-1, lo – low, hi-high, ALDH – aldehyde dehydrogenase, ADSC – adipose-derived stromal cell, MAPC – multipotent adult progenitor cells, MAPC-U – undifferentiated MAPCs, MAPC-VP – MAPC-derived vascular pro-genitors, MAPC – derived vascular pro-genitors, BMC – bone marrow stem/progenitor cells, ApoE<sup>-/-</sup> – hypercholesterolemic mouse, CD34<sup>+</sup>/Mcad<sup>+</sup> BMC – BMC expressing both CD34 and M- cadherin surface molecules, CD34<sup>-</sup>/Mcad<sup>+</sup> BMC – BMC expressing M- cadherin surface molecules, CD34<sup>+</sup>/Mcad<sup>-</sup> BMC – BMC expressing both CD34 surface molecules

Supplemental Figure 1: Primary data of proteomic responses to critical limb ischemia (CLI) and pulsed focused ultrasound (pFUS). \* $p < 0.05$  using one-way ANOVA with Bonferroni correction;  $n = 6$  mice/group. Data are means  $\pm$  SD. See Supplemental Table 1 above for abbreviations.

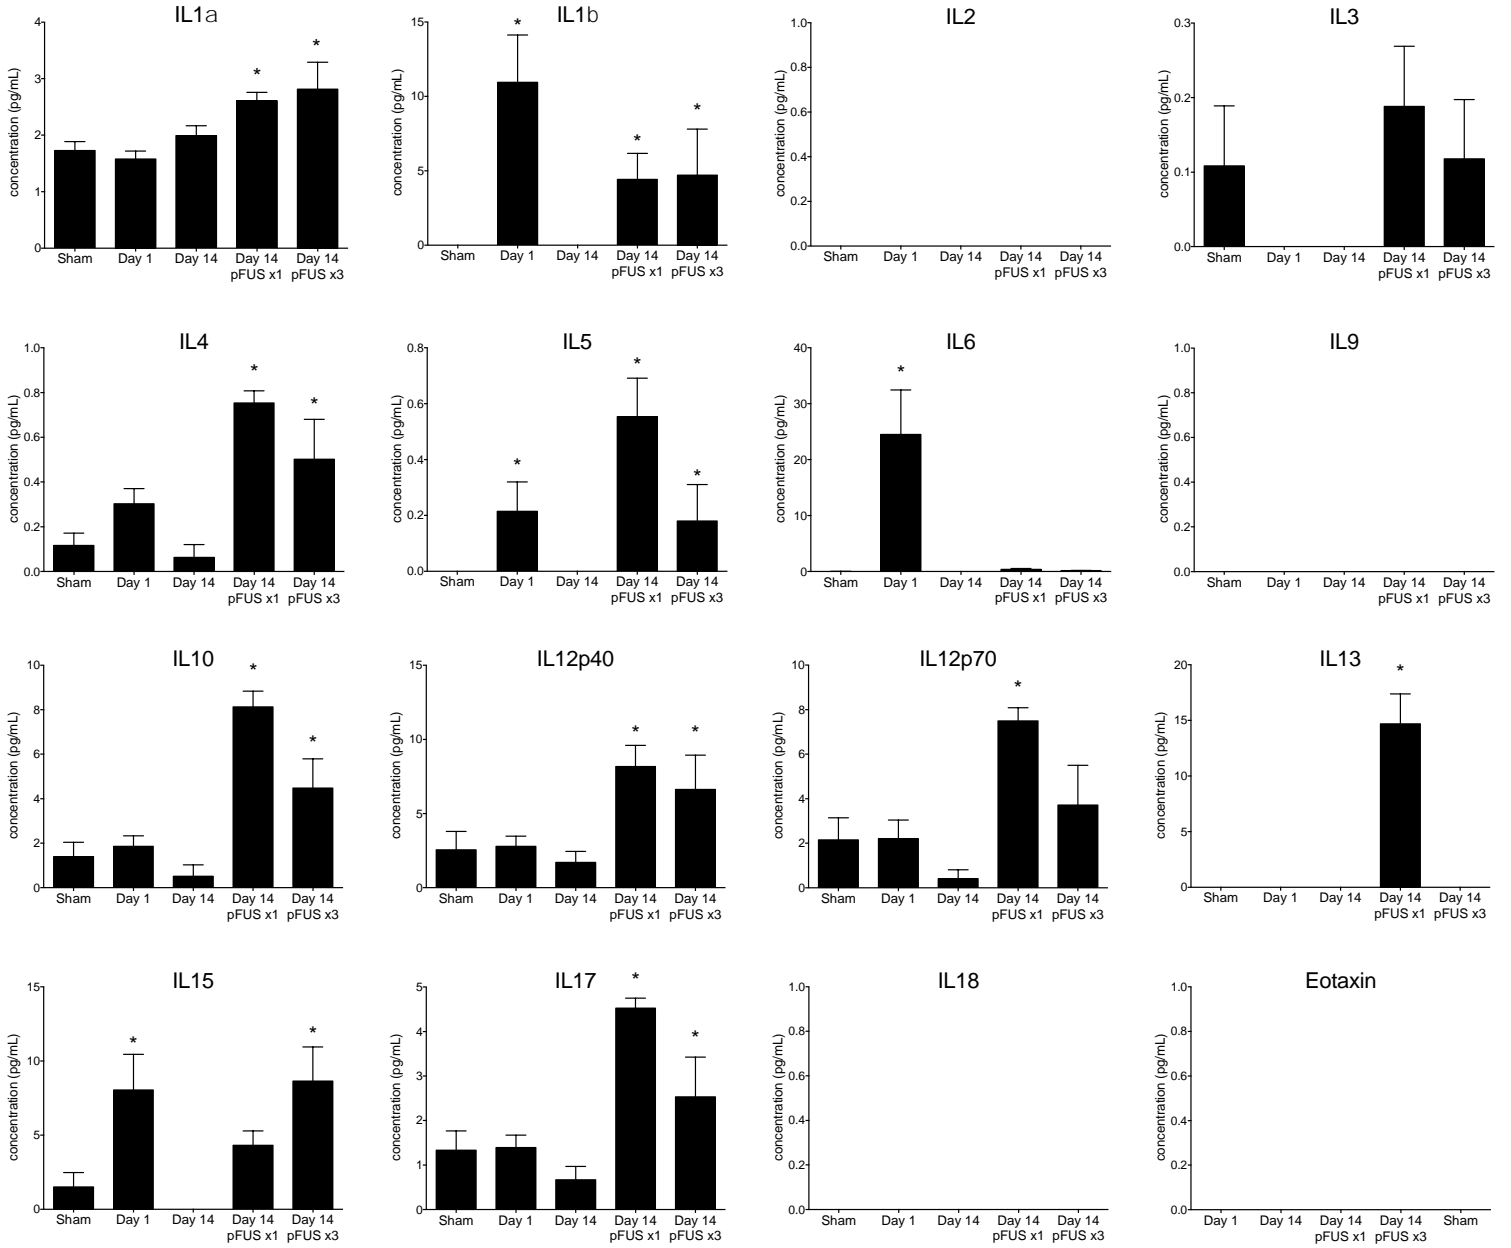

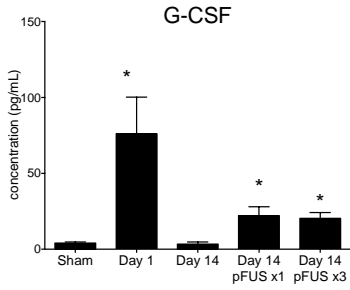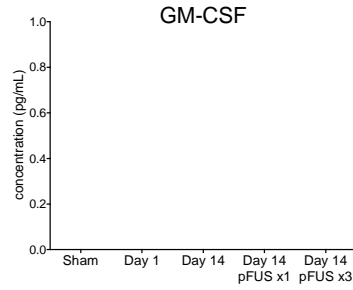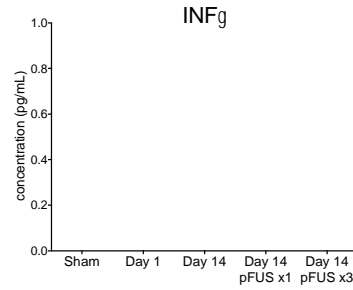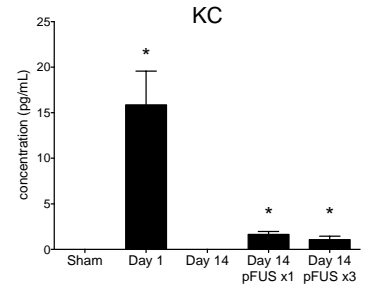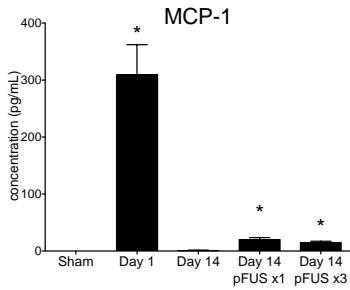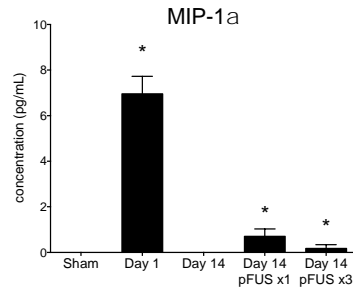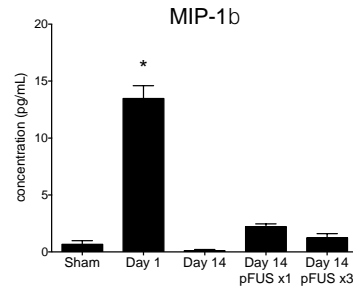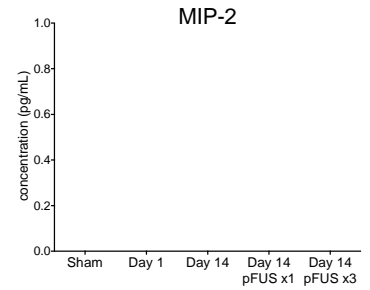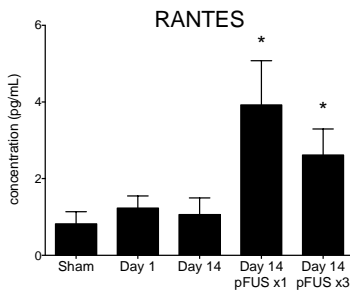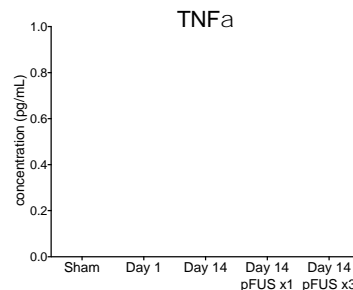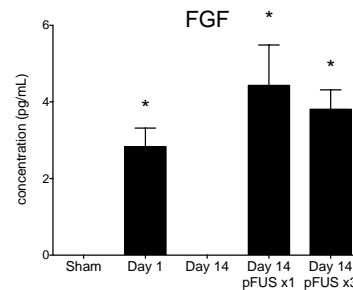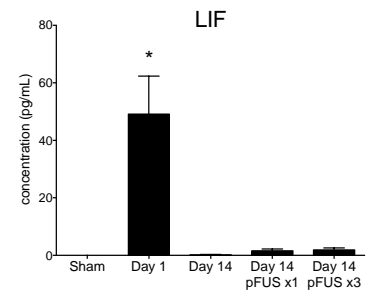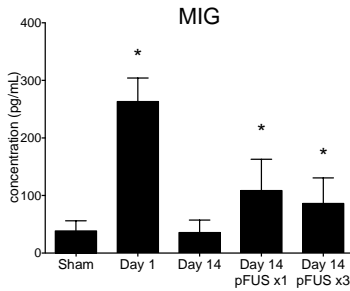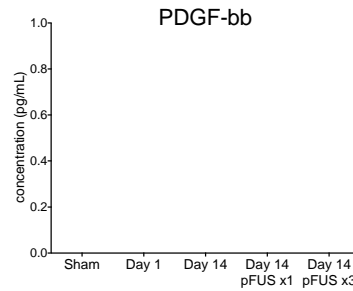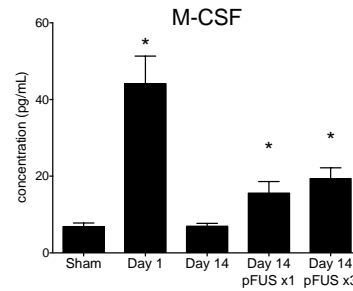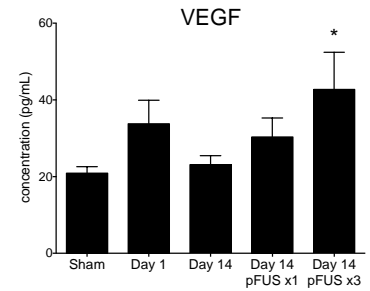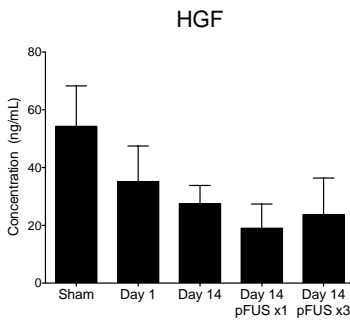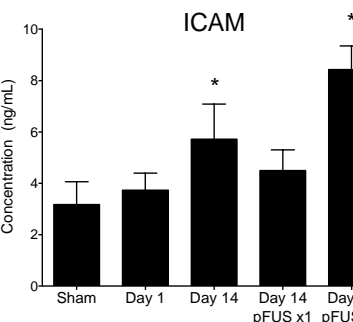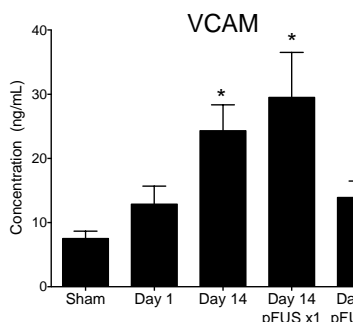

Supplement: srep41550-s1.pdf [file srep41550-s1.pdf]
